# Supplementary material
Source: publisher site journal article supplement (https://mycokeys.pensoft.net/article/4852/download/suppl/32/)
Supplement: Supplementary file 1

## Sheet: Sheet1
Table S2. Composition of the Mix24 mock community, clustering of the sequences and primer mismatches. In clustering panel, different numbers indicate different OTUs. OTUs highlighted in violet, orange, and yellow were effectively merged at 100%, 98% and 97% similarity, respectively.
Isolates				Clustering at 97% similarity threshold								Mismatches to individual primers
	Culture code	Order	Phylum	SSU515F-Euk742R	SSU817F-SSU1196Rngs	ITS1	ITS2	LR0Rngs-LF402	LF402Fmix-TW13	LR3R-LR5		ITS1Fngs	ITS1ngs	ITS2	ITS3tagmix	gITS7	ITS4ngs	LR0Rngs	LF402	LF402Fmix	TW13	LR3R	LR5	SSU515Fngs	Euk742R	SSU817F	SSU1196Rngs
Archaeorhizomyces	L9205CK	Archaeorhizomycetales	Ascomycota	1	1	1	1	1	1	1		0	0	0	0	0	2	2	0	0	0	0	0	1	0	0	0
Archaeorhizomyces borealis	600	Archaeorhizomycetales	Ascomycota	1	1	2	2	2	2	1		0	0	0	0	0	2	2	0	0	0	0	0	1	0	0	0
Archaeorhizomyces finlayi	Ny10	Archaeorhizomycetales	Ascomycota	1	1	3	3	3	3	1		0	0	0	0	0	2	2	0	0	0	0	0	1	0	0	0
Exophiala	116350K	Chaetothyriales	Ascomycota	4	4	4	4	4	4	4		0	0	0	0	0	0	0	0	0	0	0	0	0	0	0	0
Helotiales	116291BK	Helotiales	Ascomycota	6	5	5	5	5	5	5		0	0	0	0	0	0	0	0	0	0	0	0	0	0	0	0
Rhizoscyphus	L9172AK	Helotiales	Ascomycota	6	6	6	6	6	6	6		0	0	0	0	0	0	0	0	0	0	0	0	0	0	0	0
Sydowia	116379K	Dothideales	Ascomycota	6	6	7	7	7	7	6		0	0	0	0	0	0	0	0	0	0	0	0	0	0	0	0
Neonectria	116397K	Hypocreales	Ascomycota	8	6	8	8	8	8	8		0	2	0	0	0	0	0	0	0	0	0	0	0	0	0	0
Saccharomycetales	L138K	Saccharomycetales	Ascomycota	9	6	9	9	9	9	9		0	0	0	0	0	0	0	0	0	0	0	0	0	0	0	0
Athelopsis	116402K	Atheliales	Basidiomycota	10	13	10	10	10	10	10		0	0	0	0	0	0	0	0	0	0	0	0	0	0	0	0
Corticiales	116256K	Corticiales	Basidiomycota	13	13	11	11	11	11	11		0	0	0	0	0	0	0	0	0	0	0	0	0	1	0	0
Tomentellopsis zygodesmoides	L118K	Thelephorales	Basidiomycota	13	13	12	12	12	12	12		0	0	0	0	0	0	0	0	0	0	0	0	0	0	0	0
Tomentella lilacinogrisea	L9205EK	Thelephorales	Basidiomycota	13	13	13	13	13	13	13		0	0	0	0	0	0	0	0	0	0	0	0	0	0	0	0
Tomentella stuposa	L9190AK	Thelephorales	Basidiomycota	13	13	14	14	13	13	13		0	0	0	0	0	0	0	0	0	0	0	0	0	0	0	0
Hyphoderma transiens	116392K	Corticiales	Basidiomycota	13	13	15	15	15	15	16		0	0	0	0	0	0	0	0	0	0	0	0	0	0	0	0
Entoloma rhodopolium	116255K	Agaricales	Basidiomycota	16	16	16	16	16	16	16		0	0	0	0	0	0	0	0	0	0	0	0	0	1	0	0
Entoloma sinuatum	116289K	Agaricales	Basidiomycota	16	16	17	17	16	17	16		0	0	0	0	0	0	0	0	0	0	0	0	0	1	0	0
Lyophyllum caerulescens	116221K	Agaricales	Basidiomycota	16	16	18	18	16	18	18		0	0	0	0	0	0	0	0	0	0	0	0	0	1	0	0
Tricholoma columbetta	116271K	Agaricales	Basidiomycota	16	16	19	19	19	19	19		0	0	0	0	0	0	0	0	0	0	0	0	0	1	0	0
Lyophyllum fumosum	185022K	Agaricales	Basidiomycota	16	16	20	20	20	20	20		0	0	0	0	0	0	0	0	0	0	0	0	0	1	0	0
Lyophyllum	116219k	Agaricales	Basidiomycota	16	16	21	21	20	20	20		0	0	0	0	0	0	0	0	0	0	0	0	0	1	0	0
Mallocybe lacera	116369K	Agaricales	Basidiomycota	22	16	22	22	22	22	22		0	0	0	0	0	0	0	0	0	0	0	0	0	1	0	0
Russula luteotacta	116322BK	Russulales	Basidiomycota	23	23	23	23	23	23	23		0	0	0	0	0	0	0	0	0	0	0	0	0	0	0	0
Tulasnella	EVA06	Cantharellales	Basidiomycota	24	24	24	24	24	24	24		2	0	6	6	7	3	3	5	5	0	0	0	n.d.	5	4	n.d.
			Number of OTUs	11	8	24	24	20	22	17
